# Supplementary material for: Effect of Risankizumab on Patient-Reported Outcomes in Moderate to Severe Psoriasis: The UltIMMa-1 and UltIMMa-2 Randomized Clinical Trials
Source: PubMed Central journal article supplement — JAMA Dermatol. 2020 Oct 14;156(12):1–10. doi: 10.1001/jamadermatol.2020.3617 (PMC7557488; doi:10.1001/jamadermatol.2020.3617), 2020-10-14

## Supplemental Online Content

Augustin M, Lambert J, Zema C, et al. The Effect of Risankizumab on Patient-Reported Outcomes in Moderate to Severe Psoriasis: The UltIMMa-1 and UltIMMa-2 Randomized Clinical Trials. *JAMA Dermatol*. Published online October 14, 2020. doi: 10.1001/jamadermatol.2020.3617

### **eFigure.** Consort Diagram

This supplemental material has been provided by the authors to give readers additional information about their work.

**eFigure 1. CONSORT diagram**  
**UltIMMa-1**

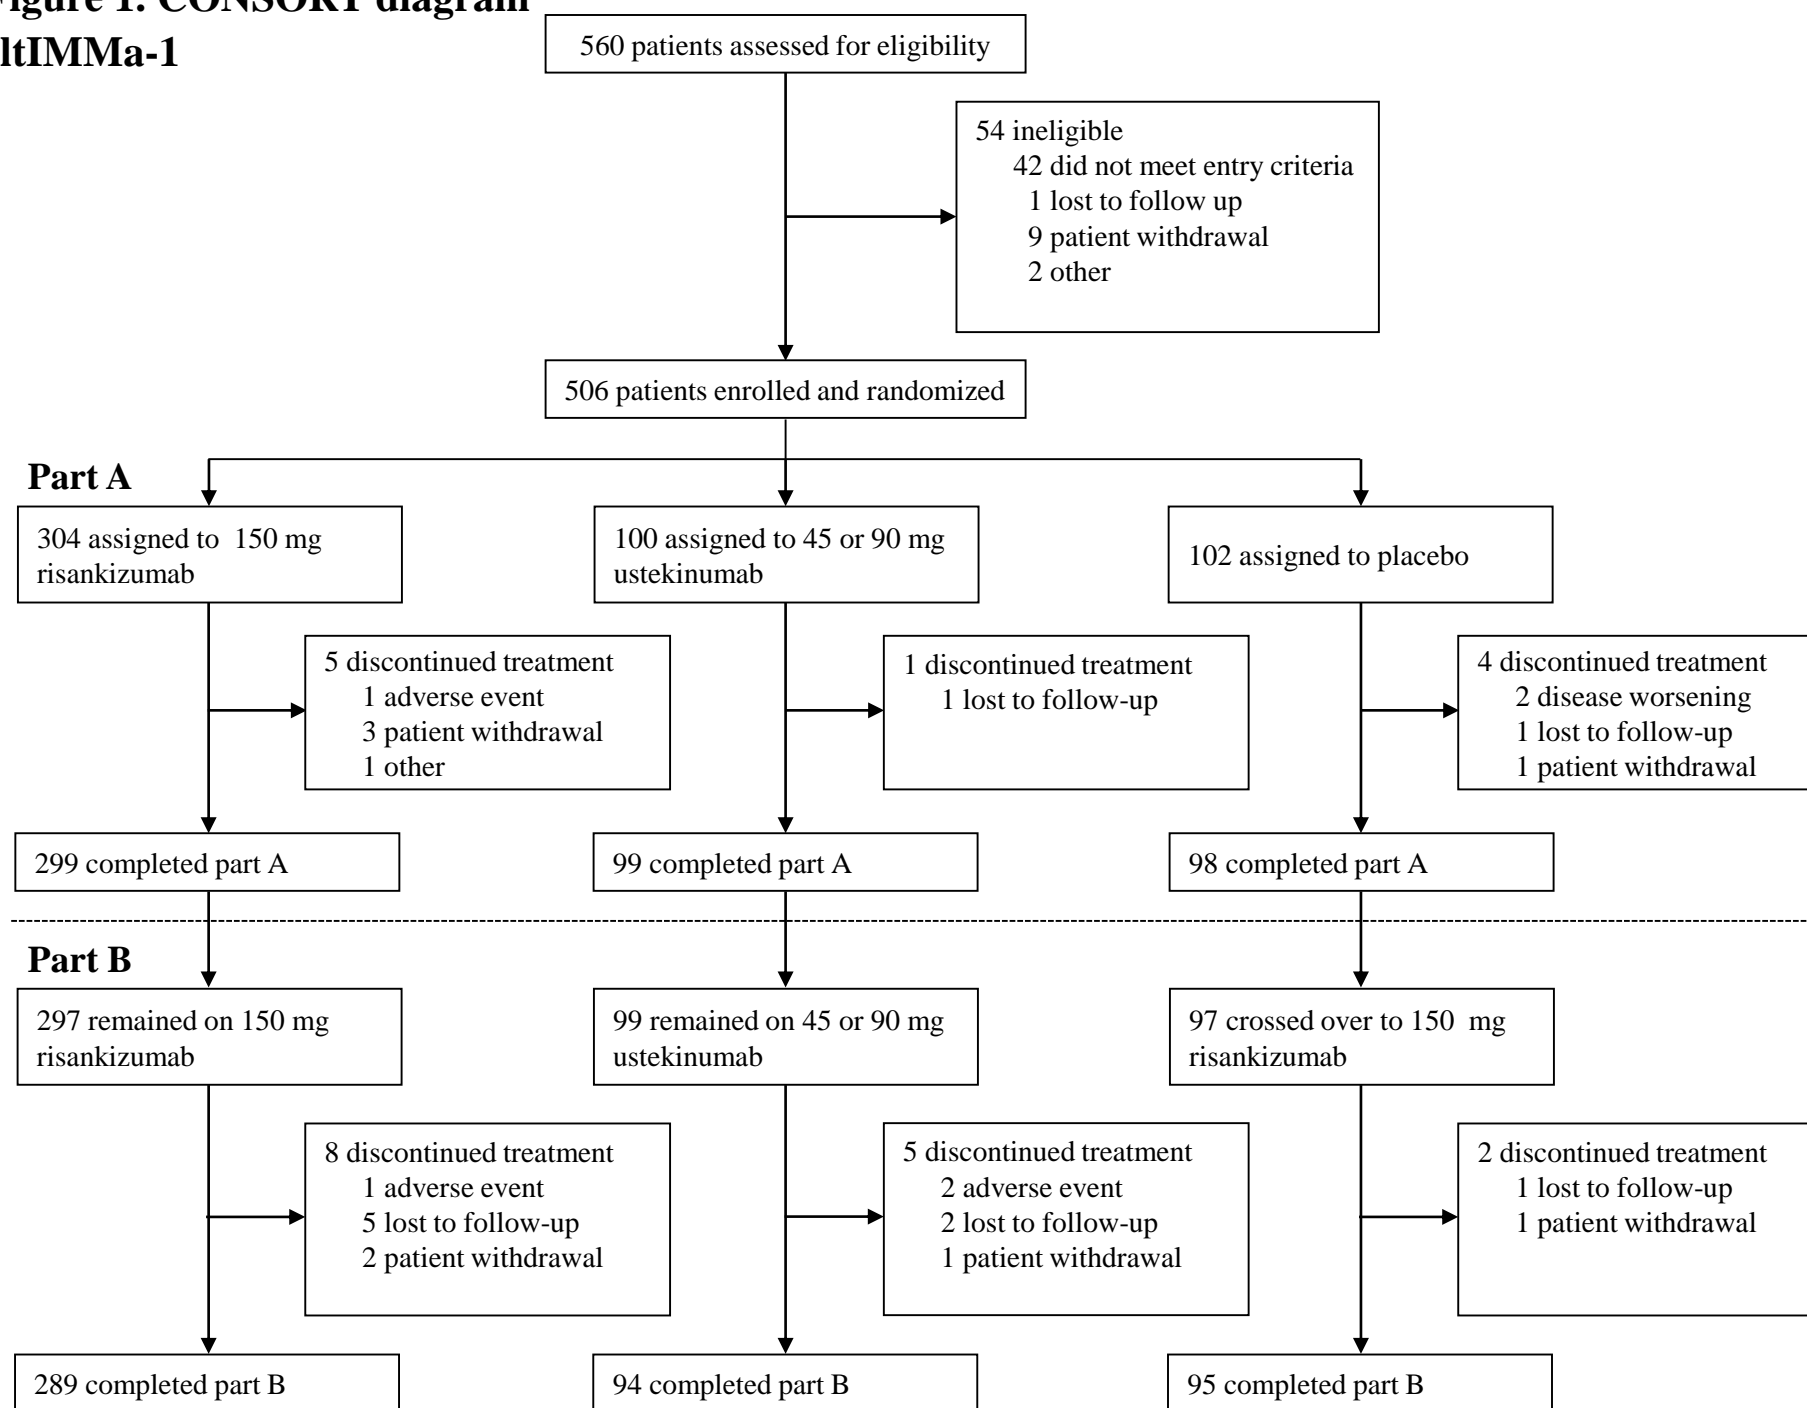

**UltIMMa-2**

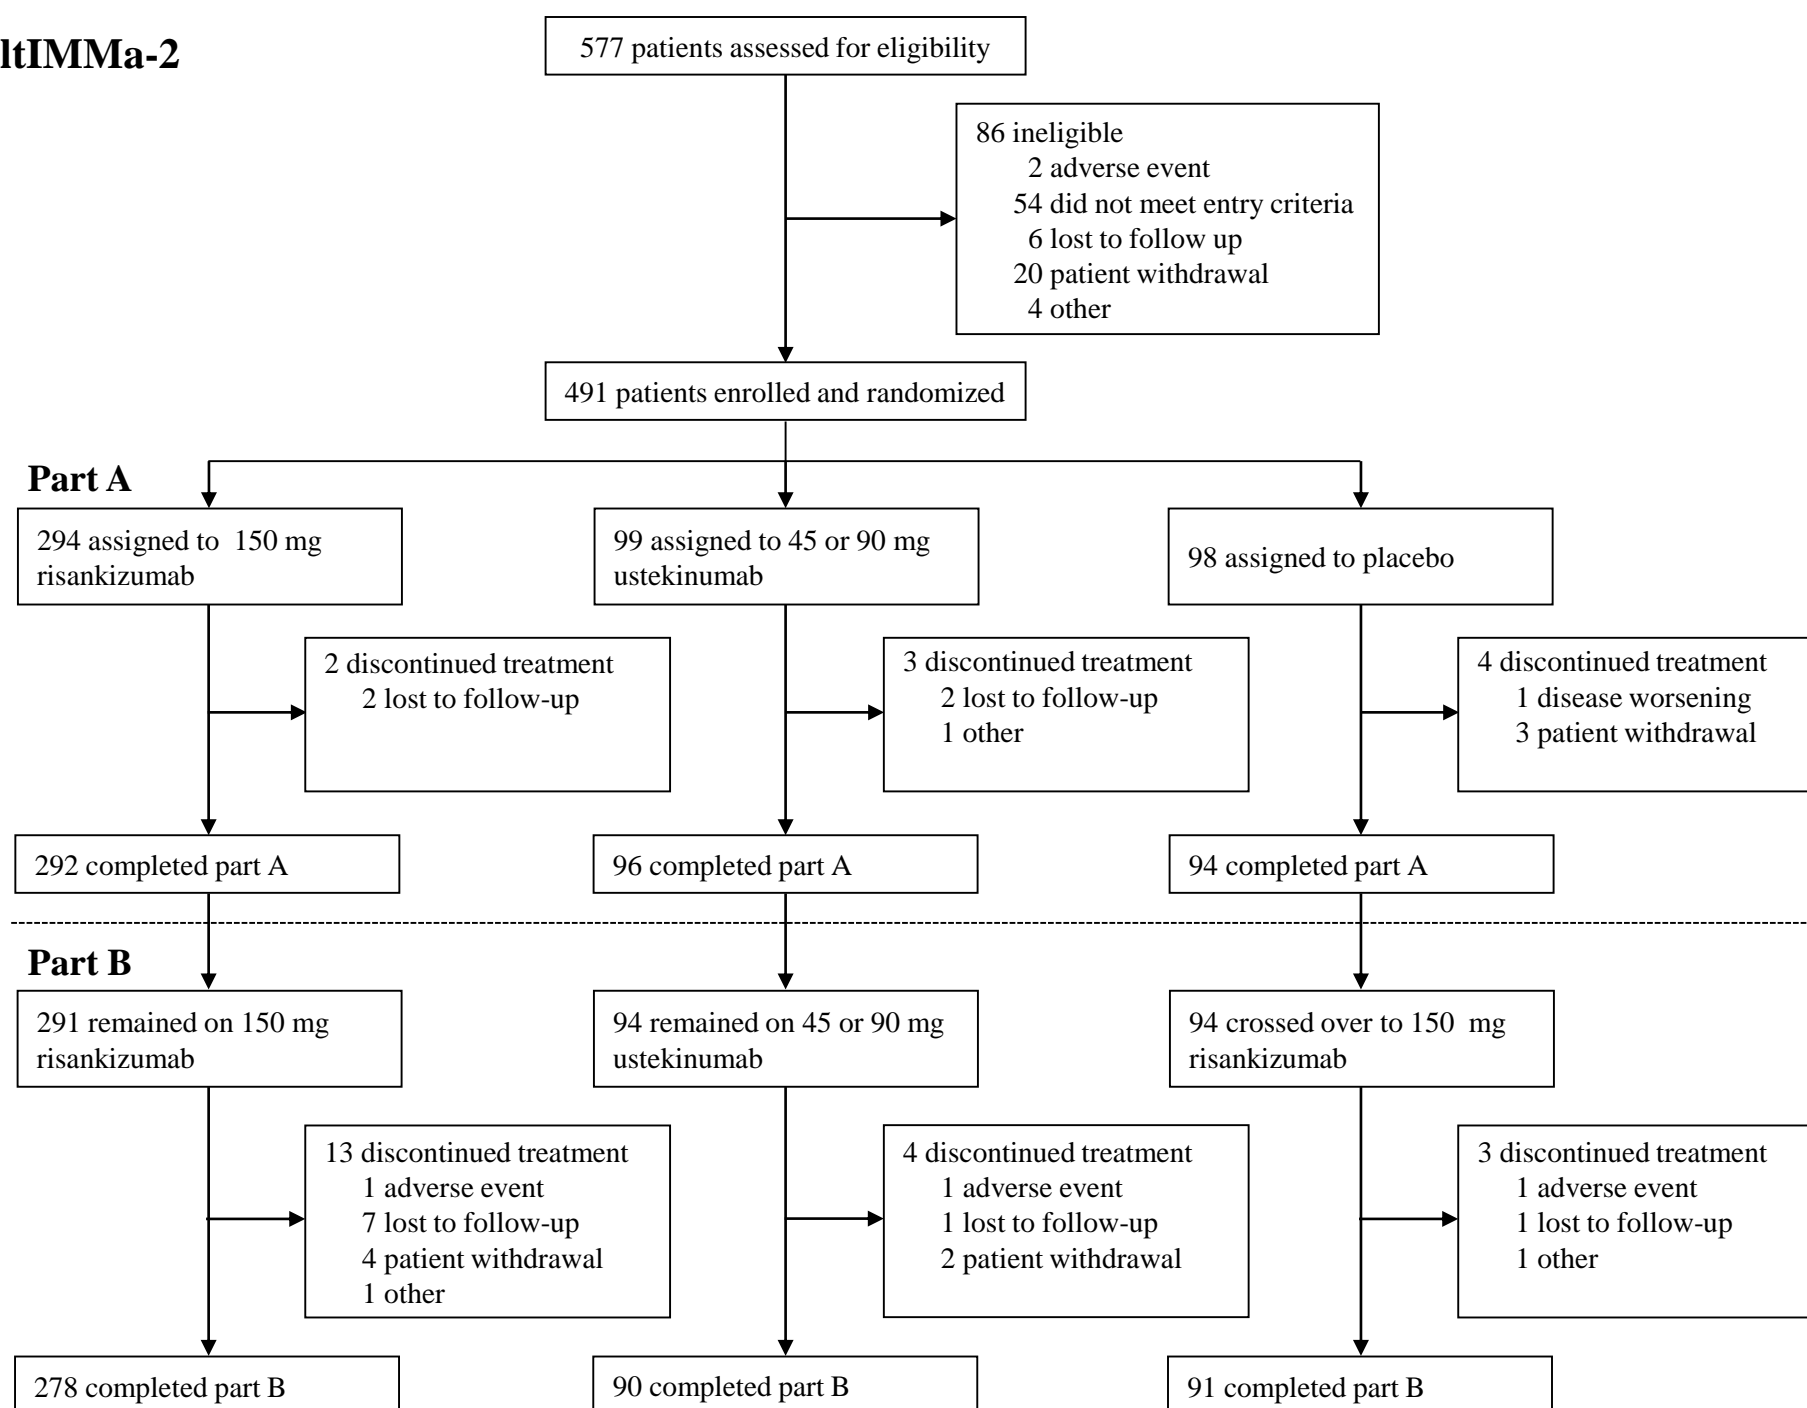

Supplement: jamadermatol-e203617-s005.pdf [file jamadermatol-e203617-s005.pdf]
