# Supplementary material for: Effect of Risankizumab on Patient-Reported Outcomes in Moderate to Severe Psoriasis: The UltIMMa-1 and UltIMMa-2 Randomized Clinical Trials
Source: PubMed Central journal article supplement — JAMA Dermatol. 2020 Oct 14;156(12):1–10. doi: 10.1001/jamadermatol.2020.3617 (PMC7557488; doi:10.1001/jamadermatol.2020.3617), 2020-10-14
Supplement: jamadermatol-e203617-s006.pdf [file jamadermatol-e203617-s006.pdf]

## **Data Sharing Statement**

Augustin. Effect of Risankizumab on Patient-Reported Outcomes in Moderate to Severe Psoriasis. *JAMA Dermatol*. Published October 14, 2020. 10.1001/jamadermatol.2020.3617

### **Data**

**Data available:** No
